# Supplementary figures and images for: Stereotactic body radiotherapy for stage I lung cancer and small lung metastasis: evaluation of an immobilization system for suppression of respiratory tumor movement and preliminary results
Source: Springer Nature journal article supplement (doi:10.1186/1748-717x-4-15), 2009-05-28

Craniocaudal direction

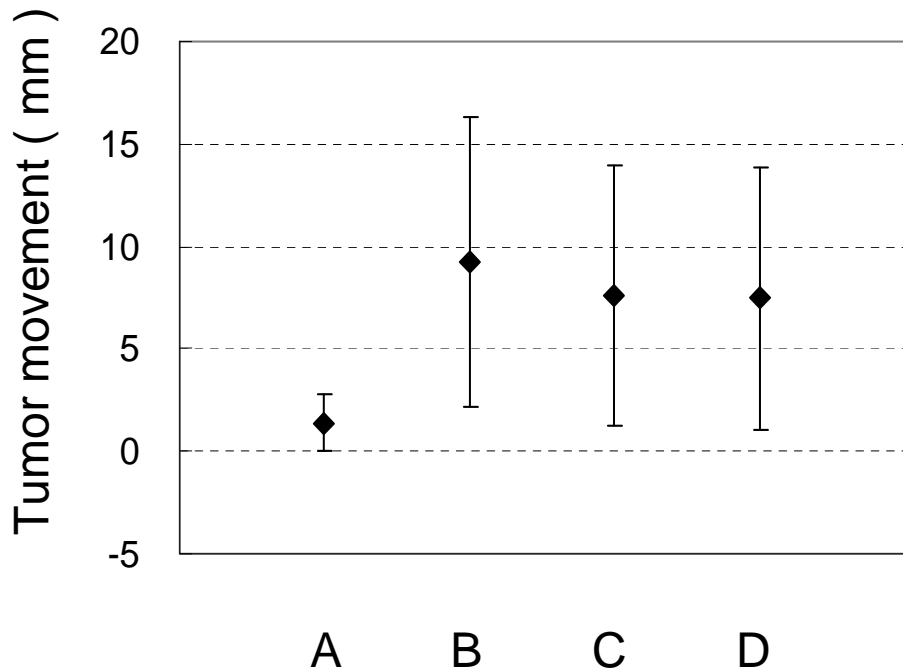

Right-to-left direction

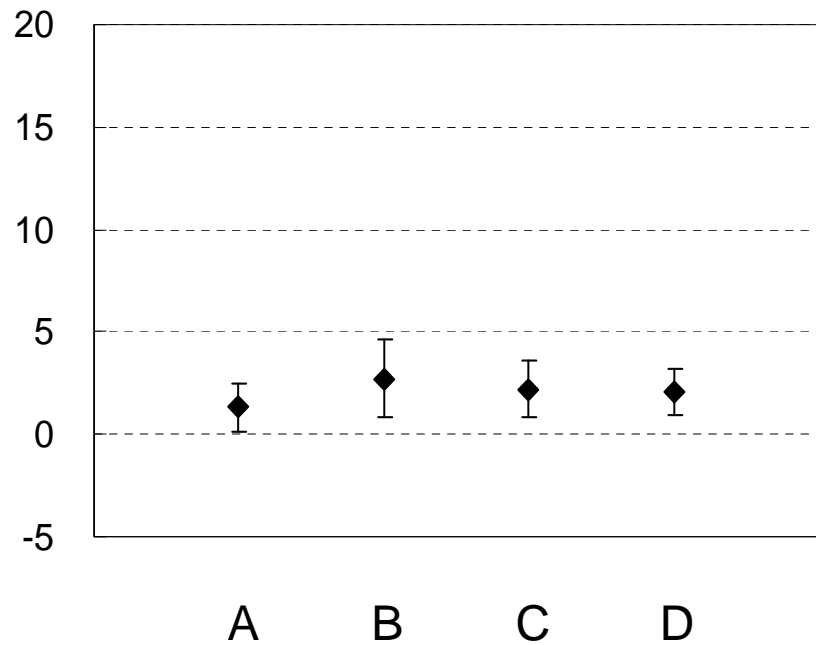

Patient condition

Supplement: 13014_2009_152_MOESM2_ESM.pdf [file 13014_2009_152_MOESM2_ESM.pdf]
